# Supplementary material
Source: PubMed Central journal article supplement (PMC4083379)
Supplement: jcbfm201465x1.pdf [file jcbfm201465x1.pdf]

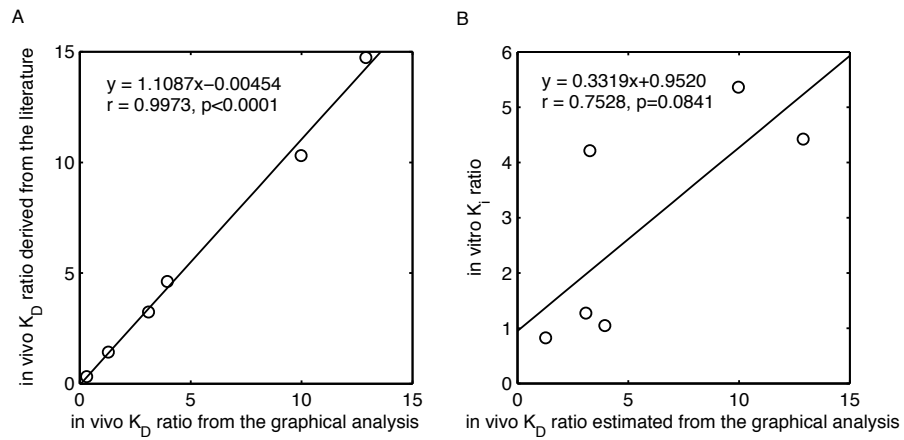

Supplementary Figure 1. Validation of the in vivo  $K_D$  ratio estimation using 4 SERT radioligands: [ $^{11}\text{C}$ ]ADAM, [ $^{11}\text{C}$ ]DASB, [ $^{11}\text{C}$ ]DAPA and [ $^{11}\text{C}$ ]AFM. A: The comparison of the in vivo  $K_D$  ratio for 6 paired ligands estimated from the graphical analysis with the ratio derived from the  $V_T$  estimates using cerebellum as a reference region and  $f_p$  measurements in the literature. B: The comparison of the in vivo  $K_D$  ratio estimated from the graphical analysis with the in vitro  $K_i$  ratio.
